# Supplementary material for: Farmers' Sources and Varieties of Cassava Planting Materials in Coastal Kenya
Source: Frontiers journal article supplement (doi:10.3389/fsufs.2021.611089), 2021-12-06
Supplement: Data_Sheet_2.pdf [file Data_Sheet_2.pdf]

## Appendix 2: The semi-structured questionnaire

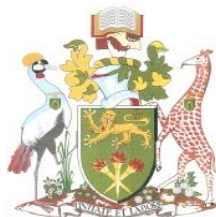

### **Department of Plant Science and Crop Protection SEMIs-Cassava project**

**Project Title:** RU/2018/CARP+/04:

**Capacity building for micro propagation and certification of cassava planting materials to enhance productivity, incomes and food and nutrition security for small holder farmers in Coastal Kenya**

#### **Introduction:**

The goal of the project is to increase cassava productivity and reduce the effect of major cassava diseases caused by viruses and bacteria. The current practice is that farmers acquire planting materials from each other or KALRO centers and in the process this has been a very effective method of distributing infected or diseased planting materials. In addition, many cassava producing countries in Africa including Kenya have no protocol to produce and certify healthy cassava planting materials. Thus, the integration of greenhouse technology as a protected environment will allow KEPHIS to certify cassava planting materials emanating from these greenhouses to ensure that the multiplication and distribution of these materials are disease free.

### **CASSAVA BASELINE SURVEY QUESTIONNAIRES**

#### **KILIFI AND TAITA TAVETA COUNTY.**

#### **Introduction and verbal consent taking**

My name is .....undertaking this research on behalf of the University of Nairobi and RUFORUM on Capacity building for micro propagation and certification of cassava planting materials to enhance productivity, incomes and food and nutrition security for small holder farmers in Coastal Kenya. I would like to invite you on behalf of the University of Nairobi to take part in the study that is aimed at increasing productivity of cassava in this region. I am requesting you to help us learn more about cassava production, marketing and utilization. All that you will say will be confidential for purposes of this study and participation is voluntary. If you agree, I will ask you some questions.

Yes ( )

No ( )

|                   |                |
|-------------------|----------------|
| Questionnaire No. | Interview Date |
| Enumerator's name |                |

## SECTION 1

### Data Collection Guidelines

|                                    |                                                                                                                                                                                                                                                                                                                                                                                                                                                                                                                                                                                                                                                                                                           |                                                                                                                                                                                                                                                                                                                                                                                                                                                                                                                                                                                                                                                         |                                    |       |       |                        |         |       |                   |           |       |             |          |       |       |       |  |                |  |                                                                                                                              |
|------------------------------------|-----------------------------------------------------------------------------------------------------------------------------------------------------------------------------------------------------------------------------------------------------------------------------------------------------------------------------------------------------------------------------------------------------------------------------------------------------------------------------------------------------------------------------------------------------------------------------------------------------------------------------------------------------------------------------------------------------------|---------------------------------------------------------------------------------------------------------------------------------------------------------------------------------------------------------------------------------------------------------------------------------------------------------------------------------------------------------------------------------------------------------------------------------------------------------------------------------------------------------------------------------------------------------------------------------------------------------------------------------------------------------|------------------------------------|-------|-------|------------------------|---------|-------|-------------------|-----------|-------|-------------|----------|-------|-------|-------|--|----------------|--|------------------------------------------------------------------------------------------------------------------------------|
| <b>1</b>                           | <p><b>County</b> .....</p> <p><b>Sub-county</b> .....</p> <p><b>Location</b> .....</p> <p><b>Village</b> .....</p>                                                                                                                                                                                                                                                                                                                                                                                                                                                                                                                                                                                        | <p><b>Ward</b> .....</p> <p><b><u>GPS Coordinates</u></b></p> <p><b>Longitude (E)</b>.....</p> <p><b>Latitude (S)</b> .....</p> <p><b>Altitude</b> .....</p>                                                                                                                                                                                                                                                                                                                                                                                                                                                                                            |                                    |       |       |                        |         |       |                   |           |       |             |          |       |       |       |  |                |  |                                                                                                                              |
| <b>2</b>                           | <p><b>Name of Farmer</b></p> <p>.....</p> <p><b>Sex:</b> Female [ 0 ]      Male [ 1 ]</p>                                                                                                                                                                                                                                                                                                                                                                                                                                                                                                                                                                                                                 | <p><b>Age of farmer:</b> ..... <b>Years</b></p> <table border="1" style="width: 100%; border-collapse: collapse;"> <tr> <td style="width: 60%;">Youth</td><td style="width: 20%; text-align: center;">&lt; 35</td><td style="width: 20%; text-align: center;">[ 1 ]</td></tr> <tr> <td>Middle aged</td><td style="text-align: center;">36 - 50</td><td style="text-align: center;">[ 2 ]</td></tr> <tr> <td>Upper middle aged</td><td style="text-align: center;">51 - 60</td><td style="text-align: center;">[ 3 ]</td></tr> <tr> <td>Retiree</td><td style="text-align: center;">&gt; 60</td><td style="text-align: center;">[ 4 ]</td></tr> </table> | Youth                              | < 35  | [ 1 ] | Middle aged            | 36 - 50 | [ 2 ] | Upper middle aged | 51 - 60   | [ 3 ] | Retiree     | > 60     | [ 4 ] |       |       |  |                |  |                                                                                                                              |
| Youth                              | < 35                                                                                                                                                                                                                                                                                                                                                                                                                                                                                                                                                                                                                                                                                                      | [ 1 ]                                                                                                                                                                                                                                                                                                                                                                                                                                                                                                                                                                                                                                                   |                                    |       |       |                        |         |       |                   |           |       |             |          |       |       |       |  |                |  |                                                                                                                              |
| Middle aged                        | 36 - 50                                                                                                                                                                                                                                                                                                                                                                                                                                                                                                                                                                                                                                                                                                   | [ 2 ]                                                                                                                                                                                                                                                                                                                                                                                                                                                                                                                                                                                                                                                   |                                    |       |       |                        |         |       |                   |           |       |             |          |       |       |       |  |                |  |                                                                                                                              |
| Upper middle aged                  | 51 - 60                                                                                                                                                                                                                                                                                                                                                                                                                                                                                                                                                                                                                                                                                                   | [ 3 ]                                                                                                                                                                                                                                                                                                                                                                                                                                                                                                                                                                                                                                                   |                                    |       |       |                        |         |       |                   |           |       |             |          |       |       |       |  |                |  |                                                                                                                              |
| Retiree                            | > 60                                                                                                                                                                                                                                                                                                                                                                                                                                                                                                                                                                                                                                                                                                      | [ 4 ]                                                                                                                                                                                                                                                                                                                                                                                                                                                                                                                                                                                                                                                   |                                    |       |       |                        |         |       |                   |           |       |             |          |       |       |       |  |                |  |                                                                                                                              |
| <b>3</b>                           | <p><b>Head of household (sex)</b></p> <p>Female [ 0 ]      Male [ 1 ]</p> <p>Household size (Number of members).....</p>                                                                                                                                                                                                                                                                                                                                                                                                                                                                                                                                                                                  | <p><b>Own Farm size</b> ..... <b>acres</b></p> <table border="1" style="width: 100%; border-collapse: collapse;"> <tr> <td style="width: 60%; text-align: center;">&lt; 2</td><td style="width: 40%; text-align: center;">[ 1 ]</td></tr> <tr> <td style="text-align: center;">2 - 5</td><td style="text-align: center;">[ 2 ]</td></tr> <tr> <td style="text-align: center;">6 – 15</td><td style="text-align: center;">[ 3 ]</td></tr> <tr> <td style="text-align: center;">&gt; 15</td><td style="text-align: center;">[ 4 ]</td></tr> </table> <p><b>Rented farm size (if any)</b>..... <b>acres</b></p>                                            | < 2                                | [ 1 ] | 2 - 5 | [ 2 ]                  | 6 – 15  | [ 3 ] | > 15              | [ 4 ]     |       |             |          |       |       |       |  |                |  |                                                                                                                              |
| < 2                                | [ 1 ]                                                                                                                                                                                                                                                                                                                                                                                                                                                                                                                                                                                                                                                                                                     |                                                                                                                                                                                                                                                                                                                                                                                                                                                                                                                                                                                                                                                         |                                    |       |       |                        |         |       |                   |           |       |             |          |       |       |       |  |                |  |                                                                                                                              |
| 2 - 5                              | [ 2 ]                                                                                                                                                                                                                                                                                                                                                                                                                                                                                                                                                                                                                                                                                                     |                                                                                                                                                                                                                                                                                                                                                                                                                                                                                                                                                                                                                                                         |                                    |       |       |                        |         |       |                   |           |       |             |          |       |       |       |  |                |  |                                                                                                                              |
| 6 – 15                             | [ 3 ]                                                                                                                                                                                                                                                                                                                                                                                                                                                                                                                                                                                                                                                                                                     |                                                                                                                                                                                                                                                                                                                                                                                                                                                                                                                                                                                                                                                         |                                    |       |       |                        |         |       |                   |           |       |             |          |       |       |       |  |                |  |                                                                                                                              |
| > 15                               | [ 4 ]                                                                                                                                                                                                                                                                                                                                                                                                                                                                                                                                                                                                                                                                                                     |                                                                                                                                                                                                                                                                                                                                                                                                                                                                                                                                                                                                                                                         |                                    |       |       |                        |         |       |                   |           |       |             |          |       |       |       |  |                |  |                                                                                                                              |
| <b>4</b>                           | <table border="1" style="width: 100%; border-collapse: collapse;"> <tr> <td style="width: 15%; text-align: center; vertical-align: top;"><b>Respondent main occupation</b></td><td style="width: 60%;">Formal Employment</td><td style="width: 25%; text-align: center;">[ 1 ]</td></tr> <tr> <td></td><td>Casual Employment Time</td><td style="text-align: center;">[ 2 ]</td></tr> <tr> <td></td><td>Business Person</td><td style="text-align: center;">[ 3 ]</td></tr> <tr> <td></td><td>Full Farmer</td><td style="text-align: center;">[ 4 ]</td></tr> <tr> <td></td><td>Other</td><td style="text-align: center;">[ 5 ]</td></tr> <tr> <td></td><td colspan="2">(Specify).....</td></tr> </table> | <b>Respondent main occupation</b>                                                                                                                                                                                                                                                                                                                                                                                                                                                                                                                                                                                                                       | Formal Employment                  | [ 1 ] |       | Casual Employment Time | [ 2 ]   |       | Business Person   | [ 3 ]     |       | Full Farmer | [ 4 ]    |       | Other | [ 5 ] |  | (Specify)..... |  | <p><b>Do you participate in other off-farm activities?</b></p> <p>Participate [ 1 ] otherwise [ 0 ]</p> <p>Specify .....</p> |
| <b>Respondent main occupation</b>  | Formal Employment                                                                                                                                                                                                                                                                                                                                                                                                                                                                                                                                                                                                                                                                                         | [ 1 ]                                                                                                                                                                                                                                                                                                                                                                                                                                                                                                                                                                                                                                                   |                                    |       |       |                        |         |       |                   |           |       |             |          |       |       |       |  |                |  |                                                                                                                              |
|                                    | Casual Employment Time                                                                                                                                                                                                                                                                                                                                                                                                                                                                                                                                                                                                                                                                                    | [ 2 ]                                                                                                                                                                                                                                                                                                                                                                                                                                                                                                                                                                                                                                                   |                                    |       |       |                        |         |       |                   |           |       |             |          |       |       |       |  |                |  |                                                                                                                              |
|                                    | Business Person                                                                                                                                                                                                                                                                                                                                                                                                                                                                                                                                                                                                                                                                                           | [ 3 ]                                                                                                                                                                                                                                                                                                                                                                                                                                                                                                                                                                                                                                                   |                                    |       |       |                        |         |       |                   |           |       |             |          |       |       |       |  |                |  |                                                                                                                              |
|                                    | Full Farmer                                                                                                                                                                                                                                                                                                                                                                                                                                                                                                                                                                                                                                                                                               | [ 4 ]                                                                                                                                                                                                                                                                                                                                                                                                                                                                                                                                                                                                                                                   |                                    |       |       |                        |         |       |                   |           |       |             |          |       |       |       |  |                |  |                                                                                                                              |
|                                    | Other                                                                                                                                                                                                                                                                                                                                                                                                                                                                                                                                                                                                                                                                                                     | [ 5 ]                                                                                                                                                                                                                                                                                                                                                                                                                                                                                                                                                                                                                                                   |                                    |       |       |                        |         |       |                   |           |       |             |          |       |       |       |  |                |  |                                                                                                                              |
|                                    | (Specify).....                                                                                                                                                                                                                                                                                                                                                                                                                                                                                                                                                                                                                                                                                            |                                                                                                                                                                                                                                                                                                                                                                                                                                                                                                                                                                                                                                                         |                                    |       |       |                        |         |       |                   |           |       |             |          |       |       |       |  |                |  |                                                                                                                              |
| <b>5</b>                           | <p><b>Academic Qualification</b></p>                                                                                                                                                                                                                                                                                                                                                                                                                                                                                                                                                                                                                                                                      | <p><b>Years of schooling</b> .....</p> <table border="1" style="width: 100%; border-collapse: collapse;"> <tr> <td style="width: 60%; text-align: center; vertical-align: top;"><b>Level of education attained</b></td><td style="width: 20%;">None</td><td style="width: 20%; text-align: center;">[ 1 ]</td></tr> <tr> <td></td><td>Primary</td><td style="text-align: center;">[ 2 ]</td></tr> <tr> <td></td><td>Secondary</td><td style="text-align: center;">[ 3 ]</td></tr> <tr> <td></td><td>Tertiary</td><td style="text-align: center;">[ 4 ]</td></tr> </table>                                                                               | <b>Level of education attained</b> | None  | [ 1 ] |                        | Primary | [ 2 ] |                   | Secondary | [ 3 ] |             | Tertiary | [ 4 ] |       |       |  |                |  |                                                                                                                              |
| <b>Level of education attained</b> | None                                                                                                                                                                                                                                                                                                                                                                                                                                                                                                                                                                                                                                                                                                      | [ 1 ]                                                                                                                                                                                                                                                                                                                                                                                                                                                                                                                                                                                                                                                   |                                    |       |       |                        |         |       |                   |           |       |             |          |       |       |       |  |                |  |                                                                                                                              |
|                                    | Primary                                                                                                                                                                                                                                                                                                                                                                                                                                                                                                                                                                                                                                                                                                   | [ 2 ]                                                                                                                                                                                                                                                                                                                                                                                                                                                                                                                                                                                                                                                   |                                    |       |       |                        |         |       |                   |           |       |             |          |       |       |       |  |                |  |                                                                                                                              |
|                                    | Secondary                                                                                                                                                                                                                                                                                                                                                                                                                                                                                                                                                                                                                                                                                                 | [ 3 ]                                                                                                                                                                                                                                                                                                                                                                                                                                                                                                                                                                                                                                                   |                                    |       |       |                        |         |       |                   |           |       |             |          |       |       |       |  |                |  |                                                                                                                              |
|                                    | Tertiary                                                                                                                                                                                                                                                                                                                                                                                                                                                                                                                                                                                                                                                                                                  | [ 4 ]                                                                                                                                                                                                                                                                                                                                                                                                                                                                                                                                                                                                                                                   |                                    |       |       |                        |         |       |                   |           |       |             |          |       |       |       |  |                |  |                                                                                                                              |

## 1 SECTION 2

### Land preparation

1. When do you expect your rain and when do they end?

| TYPE /TIME  | START(month) | END (month) |
|-------------|--------------|-------------|
| Long rains  |              |             |
| Short rains |              |             |

2. In which months do you prepare land?

a) Long rains

| JAN | FEB | MAR | APR | MAY | JUN | JUL | AUG | SEPT | OCT | NOV | DEC |
|-----|-----|-----|-----|-----|-----|-----|-----|------|-----|-----|-----|
| 1   | 2   | 3   | 4   | 5   | 6   | 7   | 8   | 9    | 10  | 11  | 12  |

b) Short rains

| JAN | FEB | MAR | APR | MAY | JUN | JUL | AUG | SEPT | OCT | NOV | DEC |
|-----|-----|-----|-----|-----|-----|-----|-----|------|-----|-----|-----|
| 1   | 2   | 3   | 4   | 5   | 6   | 7   | 8   | 9    | 10  | 11  | 12  |

3. How do you prepare your land for crop production?

Tractor [ 1 ]

Ox-plough [ 2 ]

Hand hoe [ 3 ]

Minimum tillage [ 4 ]

Other [ 5 ]

(Specify).....

4. a) Do you practice any soil conservation management?

Yes [ 1 ]

No [ 2 ]

- b) If yes, which soil conservation measures do you practice?

Cover crops [ 1 ]

Terraces [ 2 ]

Gabions [ 3 ]

Mulching [ 4 ]

Contour planting [ 5 ]  
 Minimum tillage [ 6 ]  
 Other [ 7 ]

Specify.....

5. What is the total current area under crops in acres? .....Acres

< 0.5 [ 1 ]

>0.5 to 1 [ 2 ]

>1-2 [ 3 ]

> 2 [ 4 ]

6. Do you grow cassava on your farm? Yes [ 1 ] No [ 2 ]

7. How many years of experience do you have in cassava farming? ..... Years

8. In which months do you plant cassava?

Long rains

| JAN | FEB | MAR | APR | MAY | JUN | JUL | AUG | SEPT | OCT | NOV | DEC |
|-----|-----|-----|-----|-----|-----|-----|-----|------|-----|-----|-----|
| 1   | 2   | 3   | 4   | 5   | 6   | 7   | 8   | 9    | 10  | 11  | 12  |

Short rains

| JAN | FEB | MAR | APR | MAY | JUN | JUL | AUG | SEPT | OCT | NOV | DEC |
|-----|-----|-----|-----|-----|-----|-----|-----|------|-----|-----|-----|
| 1   | 2   | 3   | 4   | 5   | 6   | 7   | 8   | 9    | 10  | 11  | 12  |

9. a) What is the total current area under cassava? .....Acres

< 0.5 [ 1 ]

>0.5 to 1 [ 2 ]

>1-2 [ 3 ]

> 2 [ 4 ]

b) Clarify on the cassava spacing in the farm in either of the measurements

| Measurement | Spacing (length by width) |
|-------------|---------------------------|
| Metres      |                           |
| Feet        |                           |
| Steps       |                           |
|             |                           |

10. a) What quantity do you harvest from the farm in one season? .....Kg

b) What is the quantity harvested per plant? .....Kg

11. On the farm where you have cassava, which was the previous crops?

.....

.....

12. a) Why do you grow cassava? (you may choose more than one)

Food [ 1 ]

Income [ 2 ]

Soil conservation [ 3 ]

Others [ 4 ]

Specify.....

13. a) Which varieties have you grown for the last two years?

| Varieties grown |       | Rank best 2 |
|-----------------|-------|-------------|
| Tajirika        | [ 1 ] |             |
| Shibe           | [ 2 ] |             |
| Kibandameno     | [ 3 ] |             |
| Nzalauka        | [ 4 ] |             |
| Karibuni        | [ 5 ] |             |
| Karembo         | [ 6 ] |             |
| Girikacha       | [ 7 ] |             |
| Others          | [ 8 ] |             |
| (specify).....  |       |             |

b) Why do prefer that variety (list)

| <b>Properties</b>          | <b>Variety 1</b> | <b>Variety 2</b> |
|----------------------------|------------------|------------------|
| High yield                 | [ 1 ]            | [ 1 ]            |
| Drought resistant          | [ 2 ]            | [ 2 ]            |
| Disease and pest resistant | [ 3 ]            | [ 3 ]            |
| Low cyanide level          | [ 4 ]            | [ 4 ]            |
| Taste                      | [ 5 ]            | [ 5 ]            |
| Others                     | [ 6 ]            | [ 6 ]            |
| Specify.....               |                  |                  |

14. When did you start growing the improved cassava variety? (code in terms of years) recall for the past 10 year

| <b>Variety</b>           | <b>Year</b> |
|--------------------------|-------------|
| Tajirika                 |             |
| Shibe                    |             |
| Kibandameno              |             |
| Nzalauka                 |             |
| Karibuni                 |             |
| Karembo                  |             |
| Girikacha                |             |
| Others<br>(specify)..... |             |

15. a) Do you intercrop cassava?

Yes [1 ]      No [ 2 ]

b) If Yes, which crops do you usually intercrop with cassava? (list)

| Crop                    |       |
|-------------------------|-------|
| Maize                   | [ 1 ] |
| Cowpea                  | [ 2 ] |
| Green gram              | [ 3 ] |
| Pigeon pea              | [ 4 ] |
| Beans                   | [ 5 ] |
| Okra                    | [ 6 ] |
| Other<br>(specify)..... | [ 7 ] |

c) Why do you intercrop? (list reasons)

| Reasons                   |       |
|---------------------------|-------|
| Small land size           | [ 1 ] |
| Reduce cost of production | [ 2 ] |
| Food security             | [ 3 ] |
| Soil conservation         | [ 4 ] |
| Other<br>(specify).....   | [ 5 ] |

16. Which variety do you intercrop and in which season?

| Variety     |       | Intercrop | Season            |
|-------------|-------|-----------|-------------------|
|             |       | Yes [ 1 ] | Long rains [ 1 ]  |
|             |       | No [ 2 ]  | Short rains [ 2 ] |
|             |       |           | Both [ 3 ]        |
| Tajirika    | [ 1 ] |           |                   |
| Shibe       | [ 2 ] |           |                   |
| Kibandameno | [ 3 ] |           |                   |

|                          |       |  |  |
|--------------------------|-------|--|--|
| Nzalauka                 | [ 4 ] |  |  |
| Karibuni                 | [ 5 ] |  |  |
| Karembo                  | [ 6 ] |  |  |
| Girikacha                | [ 7 ] |  |  |
| Others<br>(specify)..... | [ 8 ] |  |  |

17. a) Do you use fertilizer or manure on cassava?

Yes [1 ]      No [ 2 ]

b) If yes, which one and when do you apply the fertilizer and/or manure?

| Which one? |       | When?                         |
|------------|-------|-------------------------------|
|            |       | During land preparation [ 1 ] |
|            |       | During planting [ 2 ]         |
|            |       | After planting [ 3 ]          |
| Fertilizer | [ 1 ] |                               |
| Manure     | [ 2 ] |                               |
| Both       | [ 3 ] |                               |

18. a). Do you ever receive any information on cassava production?

Yes [1]      No [2]

b) If yes, what is/are the source(s) of the information, what kind of technical information do you receive? and how often?

| information                   | Source of information             | Frequency          |
|-------------------------------|-----------------------------------|--------------------|
|                               | Extension staff [ 1 ]             |                    |
|                               | Media - Radio/T.V/Newspaper [ 2 ] | Weekly [ 1 ]       |
|                               | Agro input dealer [ 3 ]           | Monthly [ 2 ]      |
|                               | From other farmers [ 4 ]          | Quarterly [ 3 ]    |
|                               | Research [ 5 ]                    | Semiannually [ 4 ] |
|                               |                                   | Annually [ 5 ]     |
| Sources of Planting materials |                                   |                    |
| New varieties                 |                                   |                    |



|                             |  |  |
|-----------------------------|--|--|
| Crop husbandry              |  |  |
| Pest and disease management |  |  |
| marketing                   |  |  |
| Utilization/processing      |  |  |
| Others                      |  |  |

19. a) Are you a member of any cassava related organization? (group or co-operative)

Yes [1] No [2]

b) If yes, which one? .....

20. a) Do you have access to credit to support your farming activities?

Yes [1] No [2]

b) If yes, which source?

Formal credit [1] informal credit [2]

c) Specify the source.....

friends [ 1 ] family [ 2 ] Group [ 3 ] Cooperative [ 4 ] micro-finance [ 5 ] bank [ 6 ] other (specify) .....

.....

21. a) Do other members of the family work on the family farm? Yes [ 1 ] No [ 2 ]

b) If Yes, How many members of your family are involved in the farm activities? .....

22. Production costs for cassava

| TYPE OF OPERATION                | COST PER UNIT | TOTAL UNITS | TOTAL COSTS |
|----------------------------------|---------------|-------------|-------------|
| <b>Labour/ mechanical costs:</b> |               |             |             |
| Land clearing                    |               |             |             |
| Ploughing                        |               |             |             |
| Furrowing                        |               |             |             |
| Harrowing                        |               |             |             |
| Planting                         |               |             |             |
| Weeding                          |               |             |             |
| Fertilizer application           |               |             |             |
| Irrigation                       |               |             |             |
| Harvesting                       |               |             |             |
| Other (specify).....             |               |             |             |

|                           |  |  |  |
|---------------------------|--|--|--|
|                           |  |  |  |
| <b>Input costs:</b>       |  |  |  |
| Seed/ cuttings            |  |  |  |
| Seed transportation       |  |  |  |
| Fertilizer/ Manure        |  |  |  |
| Fertilizer transportation |  |  |  |
| Herbicides/ Pesticides    |  |  |  |
| Pesticides transportation |  |  |  |
| Other (specify).....      |  |  |  |
|                           |  |  |  |
| <b>TOTAL COSTS</b>        |  |  |  |

23. What challenges do you face in cassava farming?

|                                                 |       |
|-------------------------------------------------|-------|
| <b>Challenge</b>                                |       |
| Drought                                         | [ 1 ] |
| Floods                                          | [ 2 ] |
| Inadequate planting materials                   | [ 3 ] |
| Pest and diseases                               | [ 4 ] |
| Low market prices                               | [ 5 ] |
| No standardized measure of produce when selling | [ 6 ] |
| Perishability                                   | [ 7 ] |
| Others<br>Specify.....                          | [ 8 ] |

### SECTION 3 ( KIDASI)

#### Planting Materials

1. Where do you source your cassava planting material and how reliable is the source?

|               |                              |                           |
|---------------|------------------------------|---------------------------|
| <b>Source</b> | (you may tick more than one) | <b>Reliability :</b>      |
|               |                              | Extremely reliable [ 1 ]  |
|               |                              | Moderately reliable [ 2 ] |
|               |                              | Low [ 3 ]                 |

|                           |       |  |
|---------------------------|-------|--|
| 1. Local market           | [ 1 ] |  |
| 2. Own seed               | [ 2 ] |  |
| 3. Neighbors              | [ 3 ] |  |
| 4. KALROs                 | [ 4 ] |  |
| 5. Other,<br>Specify..... | [ 5 ] |  |

2. How frequently do you source your cassava planting materials from KALRO?

|                                     |       |
|-------------------------------------|-------|
| Every planting season               | [ 1 ] |
| After more than one planting season | [ 2 ] |
| Never                               | [ 3 ] |

3. How many cassava cutting do you plant during a normal season?

..... stems.

4. a) Do you buy cassava cuttings?

Yes [ 1 ] No [ 2 ]

- b) What is the cost of cassava cutting in Kshs per stem (7 inch)?

Kshs .....

5. How do you transport your cassava cuttings to your farm?

| Source       |       | Delivery means:                       |
|--------------|-------|---------------------------------------|
|              |       | Pick them with my own transport [ 1 ] |
|              |       | Used hired transport [ 2 ]            |
|              |       | Delivered by KALRO [ 3 ]              |
|              |       | Others [ 4 ]                          |
|              |       | (Specify).....                        |
|              |       | .....                                 |
| Local market | [ 1 ] |                                       |
| Own seed     | [ 2 ] |                                       |
| Neighbors    | [ 3 ] |                                       |
| KALROs       | [ 4 ] |                                       |
| Other        | [ 5 ] |                                       |
| (Specify)    |       |                                       |

6. a) Once the cassava stem cuttings are in your farm, do you store them?

Yes [ 1 ] No [ 2 ]

b) If yes, how do you store them and for how long?

|                                                      |       |                |
|------------------------------------------------------|-------|----------------|
| <b>Storage method</b>                                |       | <b>Time:</b>   |
|                                                      |       | < 2days [ 1 ]  |
|                                                      |       | 3-5 days [ 2 ] |
|                                                      |       | 5-7 days [ 3 ] |
|                                                      |       | >7 days [ 4 ]  |
| Upright under a shade                                | [ 1 ] |                |
| Horizontal under a shade                             | [ 2 ] |                |
| Leave the on open field either horizontal or upright | [ 3 ] |                |
| Others,                                              | [ 4 ] |                |
| Specify .....                                        |       |                |

7. a) Is there any treatment done on the cassava cuttings before planting?

Yes [1] No [2]

b) If yes, which treatment do you do before planting the cassava cuttings?

|                  |                              |
|------------------|------------------------------|
| Treatment        | (you may tick more than one) |
| Soaking in water | [ 1 ]                        |
| Others,          | [ 2 ]                        |
| Specify .....    |                              |

8. a) What is the time taken for the cassava cuttings to sprout after planting and what is the uniformity?

|           |       |                   |
|-----------|-------|-------------------|
| Time      |       | Uniformity:       |
|           |       | Uniform [ 1 ]     |
|           |       | Not uniform [ 2 ] |
| 1 week    | [ 1 ] |                   |
| 2 weeks   | [ 2 ] |                   |
| 3 weeks   | [ 3 ] |                   |
| > 3 weeks | [ 4 ] |                   |

b) For the sprouting cassava, what is the source of water?

Rains [1] Irrigation [2] Both [3]

9. Are you aware of tissue culture technology e.g in banana?

Yes [1] No [2]

## SECTION 4 (ROSE)

### Intercrop, Vector-Host Relation questionnaire

1. a) Do you experience pest infestation?

Yes [ 1 ]    No [ 2 ]

**If No, go to Disease section**

- b) If yes, which pests do you experience, in which season and what is the prevalent rate?

| Pest          |       | Season Most Prevalent | Prevalence     |
|---------------|-------|-----------------------|----------------|
|               |       | Long rains [ 1 ]      | High [ 1 ]     |
|               |       | Short rains [ 2 ]     | Moderate [ 2 ] |
|               |       | Both [ 3 ]            | Low [ 3 ]      |
|               |       | Dry season [ 4 ]      |                |
| Whiteflies    | [ 1 ] |                       |                |
| Mealybugs     | [ 2 ] |                       |                |
| Mites         | [ 3 ] |                       |                |
| Others,       | [ 4 ] |                       |                |
| Specify ..... |       |                       |                |

2. a) Among the varieties grown do you notice any difference in whiteflies infestation?

Yes [ 1 ]    No [ 2 ]

- b) If yes, what is the level of infestation in each variety?

| Variety        |       | Infestation level |
|----------------|-------|-------------------|
|                |       | High [ 1 ]        |
|                |       | Moderate [ 2 ]    |
|                |       | Low [ 3 ]         |
| Tajirika       | [ 1 ] |                   |
| Shibe          | [ 2 ] |                   |
| Kibandameno    | [ 3 ] |                   |
| Nzalauka       | [ 4 ] |                   |
| Karibuni       | [ 5 ] |                   |
| Karembo        | [ 6 ] |                   |
| Girikacha      | [ 7 ] |                   |
| Others         | [ 8 ] |                   |
| (specify)..... |       |                   |

3. (a) Do you notice any difference in whiteflies infestation in different intercrops?

Yes [1] No [2]

- (b) If yes, what is the level of infestation in each intercrop?

| Intercrop      |       | Infestation level |
|----------------|-------|-------------------|
|                |       | High [ 1 ]        |
|                |       | Moderate [ 2 ]    |
|                |       | Low [ 3 ]         |
| Maize          | [ 1 ] |                   |
| Cowpea         | [ 2 ] |                   |
| Green gram     | [ 3 ] |                   |
| Pigeon pea     | [ 4 ] |                   |
| Beans          | [ 5 ] |                   |
| Okra           | [ 6 ] |                   |
| Other          | [ 7 ] |                   |
| (specify)..... |       |                   |

4. (a) Do you scout for pest infestation?

Yes [1] No [2]

- (b) If yes, how often do you scout?

Weekly [ 1 ] Fortnightly [ 2 ] Monthly [ 3 ] Other [ 4 ]

Specify .....

5. (a) Do you manage whiteflies?

Yes [ 1 ] No [ 2 ]

**If No, go Disease section**

- (b) If yes, how do you manage whiteflies?

| management   |       |
|--------------|-------|
| Cultural     | [ 1 ] |
| Physical     | [ 2 ] |
| Botanicals   | [ 3 ] |
| Biological   | [ 4 ] |
| chemical     | [ 5 ] |
| Other        | [ 6 ] |
| Specify..... |       |

c) If chemicals, which chemicals do you use? **If chemical not mentioned go to Disease section**

.....  
 .....  
 .....

6. (a) Do you own a sprayer?

Yes [ 1 ]    No [ 2 ]

(b) If no, where do you get the sprayer from?

Borrow [ 1 ]                  Hire [ 2 ]

(c) How often do you spray?

Weekly [ 1 ]                  monthly [ 2 ]                  quarterly [ 3 ]

Semi-annually [ 4 ]                  annually [ 5 ]

## DISEASE SECTION

1. a) Do you usually experience diseases in cassava?

Yes [ 1 ]                  No [ 2 ]

b) If yes which disease(s) do you experience? And in which months is the disease most prevalent? (Show pictures)

| Disease (you can tick more than 1) |      | Month       |            |            |  |
|------------------------------------|------|-------------|------------|------------|--|
|                                    |      | Jan [ 1 ]   | May [ 5 ]  | Sept [ 9 ] |  |
|                                    |      | Feb [ 2 ]   | June [ 6 ] | Oct [ 10 ] |  |
|                                    |      | Mar [ 3 ]   | July [ 7 ] | Nov [ 11 ] |  |
|                                    |      | April [ 4 ] | Aug [ 8 ]  | Dec [ 12 ] |  |
| Cassava bacterial blight           | [1]  |             |            |            |  |
| Bacterial angular leaf spot        | [2]  |             |            |            |  |
| Bacterial stem gall                | [3]  |             |            |            |  |
| Bacterial stem rot                 | [4]  |             |            |            |  |
| Cassava brown streak disease       | [5]  |             |            |            |  |
| African cassava mosaic virus       | [6]  |             |            |            |  |
| Cassava common mosaic virus        | [7]  |             |            |            |  |
| Cassava green mottle virus         | [8]  |             |            |            |  |
| Anthracnose                        | [9]  |             |            |            |  |
| Armillaria root rot                | [10] |             |            |            |  |

2. a) Do you practice disease scouting?

Yes [1] No [2]

- b) If yes how often do you scout?

Weekly (1) fortnightly (2) monthly (3) other(4 )

Specify .....

3. Which disease management practices do you use?

|                         |     |
|-------------------------|-----|
| Rogueing and destroying | [1] |
| Chemical control        | [2] |
| Fallowing               | [3] |
| Crop rotation           | [4] |
| None                    | [5] |
| Others                  | [6] |
| Specify.....            |     |

## SECTION 5 (LIVOD)

1. a) Do you know cassava bacterial blight?

Yes [1] No [2]

### If No move to section 6

- b) If yes, when was the first time you saw cassava bacterial blight in your farm?

|                       |     |
|-----------------------|-----|
| This year             | [1] |
| Last year             | [2] |
| 2 years ago           | [3] |
| More than 2 years ago | [4] |

2. Do you usually experience CBB every season you plant cassava in your farm?

Yes [1] No [2]

3. On which cassava varieties have you seen the cassava bacterial blight?

|             |     |
|-------------|-----|
| Tajirika    | [1] |
| Shibe       | [2] |
| Kibandameno | [3] |
| Nzalauka    | [4] |
| Karibuni    | [5] |
| Karembo     | [6] |



|               |     |
|---------------|-----|
| Girikacha     | [7] |
| Others        | [8] |
| Specify ..... |     |

4. When do most cassava plants show the symptoms of CBB infection?

|                           |     |
|---------------------------|-----|
| Young crops <3 months     | [1] |
| Mid aged crops 3-6 months | [2] |
| Older crops > 6 months    | [3] |

5. How do you manage cassava bacterial blight? (May tick more than one)

|               |     |
|---------------|-----|
| None          | [1] |
| Roughing      | [2] |
| Biological    | [3] |
| Chemical      | [4] |
| Crop rotation | [5] |
| Others        | [6] |
| Specify ..... |     |

## SECTION 6 (FLORENCE)

1. a) Are you aware of Cassava Brown streak (CBSD) [Show pictures for familiarity]

Yes [1 ] No [ 2 ]

- b) If yes, does the CBSD disease infestation appear in your farm every year?

Yes [1 ] No [ 2 ]

- c) If yes, what parts of the cassava plant are the symptoms mostly seen, when did you first notice this disease in your cassava farm and in which season is the disease severe? ,

|      | Which part | When                      | Season Most Prevalent |
|------|------------|---------------------------|-----------------------|
|      | Leaves [1] | This year [1]             | Long rains [1]        |
|      | Stem [2]   | Last year [2]             | Short rains [2]       |
|      | Roots [3]  | Two years ago [3]         | Both [3]              |
|      |            | More than 2 years ago [4] | Dry season [4]        |
|      |            | Other (5) specify         |                       |
| CBSD |            |                           |                       |

2. List the 2 most likely causes of the CBSD.

|                   |     |
|-------------------|-----|
| Planting material | [1] |
| Soil              | [2] |
| Poor weather      | [3] |
| Insect vectors    | [4] |
| Gods vengeance    | [5] |
| Others            | [6] |
| Specify.....      |     |

3. List the three most effective method you use to manage cassava brown streak disease? Please rank them in order of effectiveness to you **[1st is most effective, 3rd is least effective]**

| Method (you can tick more than one) |      | Rank |
|-------------------------------------|------|------|
| Resistant varieties                 | [1]  |      |
| Chemical control                    | [2]  |      |
| Rogueing and destroying             | [3]  |      |
| Clean planting material             | [4]  |      |
| Vector management                   | [5]  |      |
| Crop rotation                       | [6]  |      |
| Early planting                      | [8]  |      |
| Fallowing                           | [9]  |      |
| Others                              | [10] |      |
| Specify.....                        |      |      |

4. a) Are some varieties more severely affected by the disease than others?

Yes [ 1 ]      No[ 2 ]

b) If yes, tick the three varieties mostly affected

|                 |     |
|-----------------|-----|
| Tajirika        | [1] |
| Shibe           | [2] |
| Kibandameno     | [3] |
| Nzalauka        | [4] |
| Karibuni        | [5] |
| Karembo         | [6] |
| Girikacha       | [7] |
| Other           | [8] |
| (Specify) ..... |     |

5. a) Do you have any resistant varieties to the CBSD disease?

Yes [ 1 ]      No[ 2 ]

b) If Yes, List the varieties

|                 |     |
|-----------------|-----|
| Tajirika        | [1] |
| Shibe           | [2] |
| Kibandameno     | [3] |
| Nzalauka        | [4] |
| Karibuni        | [5] |
| Karembo         | [6] |
| Girikacha       | [7] |
| Other           | [8] |
| (Specify) ..... |     |

## SECTION 7 (SAMWEL)

### Part A: CASSAVA HARVESTING AND HANDLING

1. How and What time of the day do you normally harvest cassava roots/leaves?

| Harvested part | Method of harvesting:<br>piecemeal (1)<br>whole(everything)(2) | Tools used in harvesting:<br>hand/uprooting (1),<br>Jembe (2)<br>Panga (3) | Time of harvesting<br>Early morning (1)<br>Late morning(2)<br>Afternoon(3)<br>Evening(4)<br>Others..... | Reason for harvesting at this time:<br><br>market requirements (1),<br>labor availability (2),<br>temperatures (3), other (4)<br>Specify..... |
|----------------|----------------------------------------------------------------|----------------------------------------------------------------------------|---------------------------------------------------------------------------------------------------------|-----------------------------------------------------------------------------------------------------------------------------------------------|
| Roots          |                                                                |                                                                            |                                                                                                         |                                                                                                                                               |
| Leaves         |                                                                |                                                                            |                                                                                                         |                                                                                                                                               |

2. At what age do you harvest your cassava roots?

|              |       | Age at harvest (months) | Reason for harvesting at this age<br>Money [ 1 ]<br>Food [ 2 ]<br>Maturity [ 3 ]<br>Others [ 4 ] | How do you know when it is mature for harvesting?(indicators of maturity) |
|--------------|-------|-------------------------|--------------------------------------------------------------------------------------------------|---------------------------------------------------------------------------|
| Tajirika     | [ 1 ] |                         |                                                                                                  |                                                                           |
| Shibe        | [ 2 ] |                         |                                                                                                  |                                                                           |
| Kibandameno  | [ 3 ] |                         |                                                                                                  |                                                                           |
| Nzalauka     | [ 4 ] |                         |                                                                                                  |                                                                           |
| Karibuni     | [ 5 ] |                         |                                                                                                  |                                                                           |
| Karembo      | [ 6 ] |                         |                                                                                                  |                                                                           |
| Girikacha    | [ 7 ] |                         |                                                                                                  |                                                                           |
| Others       | [ 8 ] |                         |                                                                                                  |                                                                           |
| specify..... |       |                         |                                                                                                  |                                                                           |

3. Do you sort and grade cassava roots after harvesting and what is the criteria for sorting or grading?

Yes (1) No (2) (If **yes fill the table**)

| Criteria for grading/ sorting (1=size, 2= color, 3=shape, 4=damage, 5=others (specify)) | Reason for grading/sorting(1= specific markets, 2= price considerations, 3= storage ,4=others(specify)) |
|-----------------------------------------------------------------------------------------|---------------------------------------------------------------------------------------------------------|
|                                                                                         |                                                                                                         |
|                                                                                         |                                                                                                         |

4. What are the types of damage(s) to roots during harvesting and what do you do with the damaged roots?

| Type of damage    |       | Use of roots<br>immediate boiling, [ 1 ]<br>immediate processing, [ 2 ]<br>livestock feed, [ 3 ]<br>other(specify) [ 4 ] |
|-------------------|-------|--------------------------------------------------------------------------------------------------------------------------|
| Mechanical damage | [ 1 ] |                                                                                                                          |
| Pest damage       | [ 2 ] |                                                                                                                          |
| Rot               | [ 3 ] |                                                                                                                          |

5. a. Do you preserve cassava roots?

Yes (1)

No (2)

b) If yes, how do you preserve the cassava roots after harvesting and for how long (hours/days) after harvesting do you store the root before consumption?

| Preservation methods for fresh cassava |       | Where did you learn about the preservation method? | Length of preservation time (days) |
|----------------------------------------|-------|----------------------------------------------------|------------------------------------|
|                                        |       | farmer (1)                                         | 1-2 days (1)                       |
|                                        |       | kalro (2)                                          | 3-5 days (2)                       |
|                                        |       | media (3)                                          | 5-7 days (3)                       |
|                                        |       | extension officer (4) others (5)                   | Other (4)                          |
|                                        |       | specify                                            | specify.....                       |
| crop in garden,                        | [ 1 ] |                                                    |                                    |
| under shed,                            | [ 2 ] |                                                    |                                    |
| Underground(in soil) ,                 | [ 3 ] |                                                    |                                    |
| Soaked in water,                       | [ 4 ] |                                                    |                                    |
| Saw dust,                              | [ 5 ] |                                                    |                                    |
| waxing,                                | [ 6 ] |                                                    |                                    |
| Others                                 | [ 7 ] |                                                    |                                    |
| (specify))                             |       |                                                    |                                    |

### Part B: Cassava Processing

1. Do you process cassava roots and leaves on-farm?

|        |       | Yes [ 1 ]<br>No [ 2 ] | Reason for processing<br>Subsistence [ 1 ]<br>income [ 2 ] |
|--------|-------|-----------------------|------------------------------------------------------------|
| Roots  | [ 1 ] |                       |                                                            |
| Leaves | [ 2 ] |                       |                                                            |

**1 b. If yes, what products do you process? From which varieties do you process them and why from that variety?**

| Product(s),  |       | Cassava variety (you may tick more than one )<br>Tajirika (1) Shibe (2) Kibandameno (3)<br>Nzalauka(4) Karibuni (5) Karembo (6)<br>Girikacha (7) Other (8) | Reason for using variety to process the product if specific.<br>Availability (1)<br>Less fibrous (2)<br>Better product quality (3)<br>Affordable (4)<br>Less toxic (5)<br>Other (6) specify |
|--------------|-------|------------------------------------------------------------------------------------------------------------------------------------------------------------|---------------------------------------------------------------------------------------------------------------------------------------------------------------------------------------------|
| Chips        | [ 1 ] |                                                                                                                                                            |                                                                                                                                                                                             |
| Flour        | [ 2 ] |                                                                                                                                                            |                                                                                                                                                                                             |
| Grates,      | [ 3 ] |                                                                                                                                                            |                                                                                                                                                                                             |
| Gari         | [ 4 ] |                                                                                                                                                            |                                                                                                                                                                                             |
| Crisps       | [ 5 ] |                                                                                                                                                            |                                                                                                                                                                                             |
| Alcobeverage | [ 6 ] |                                                                                                                                                            |                                                                                                                                                                                             |
| Animal Feed  | [ 7 ] |                                                                                                                                                            |                                                                                                                                                                                             |
| Other        | [ 8 ] |                                                                                                                                                            |                                                                                                                                                                                             |
| Specify      |       |                                                                                                                                                            |                                                                                                                                                                                             |

**2. How and why do you process them?**

| Product(s), |       | Equipment/tools used during processing |       | Treatment during processing |       | Reasons for processing     |       | Where it takes place |       |
|-------------|-------|----------------------------------------|-------|-----------------------------|-------|----------------------------|-------|----------------------|-------|
|             |       | chippers,                              | [ 1 ] | washing                     | [ 1 ] | Cleaning                   | [ 1 ] | Designated room      | [ 1 ] |
|             |       | graters,                               | [ 2 ] | fermenting                  | [ 2 ] | Detoxify                   | [ 2 ] | Open yard            | [ 2 ] |
|             |       | solar dryers,                          | [ 3 ] | Peeling                     | [ 3 ] | Reduce bulkiness           | [ 3 ] |                      |       |
|             |       | Pounding mortar                        | [ 4 ] | Chipping                    | [ 4 ] | Ease of further processing | [ 4 ] |                      |       |
|             |       | Pangas,                                | [ 5 ] | Chopping                    | [ 5 ] | Better taste               | [ 5 ] |                      |       |
|             |       | Knives,                                | [ 6 ] | Scraping,                   | [ 6 ] | Others (specify)           | [ 6 ] |                      |       |
|             |       | Grinding mill,                         | [ 7 ] | Others (specify)            | [ 7 ] |                            |       |                      |       |
|             |       | other (name)_                          | [ 8 ] |                             |       |                            |       |                      |       |
| Chips       | [ 1 ] |                                        |       |                             |       |                            |       |                      |       |
| Flour       | [ 2 ] |                                        |       |                             |       |                            |       |                      |       |

|              |       |  |  |  |  |
|--------------|-------|--|--|--|--|
| Grates,      | [ 3 ] |  |  |  |  |
| Gari         | [ 4 ] |  |  |  |  |
| Crisps       | [ 5 ] |  |  |  |  |
| Alcobeverage | [ 6 ] |  |  |  |  |
| Animal Feed  | [ 7 ] |  |  |  |  |
| Other        | [ 8 ] |  |  |  |  |
| Specify      |       |  |  |  |  |

3. For the three most important products you make, when and how do you process and why?

| Product(s),  |       | When is processing done? |  | Duration<br><br>daily (1)<br><br>1-2 times a week(2)<br><br>Once month (3)<br><br>Other (4)<br>specify ..... | Why that duration | Factors for good quality<br><br>color (1)<br><br>texture (2)<br><br>taste (3)<br><br>other (4)<br>specify..... | How do you ensure quality<br><br>code | Why do you prefer that product?<br><br>Easy to process (2)<br><br>High prices (3)<br><br>Other (4)<br>specify |
|--------------|-------|--------------------------|--|--------------------------------------------------------------------------------------------------------------|-------------------|----------------------------------------------------------------------------------------------------------------|---------------------------------------|---------------------------------------------------------------------------------------------------------------|
|              |       | Daily                    |  |                                                                                                              |                   |                                                                                                                |                                       |                                                                                                               |
|              |       | Weekly                   |  |                                                                                                              |                   |                                                                                                                |                                       |                                                                                                               |
|              |       | Monthly                  |  |                                                                                                              |                   |                                                                                                                |                                       |                                                                                                               |
|              |       | seasonal                 |  |                                                                                                              |                   |                                                                                                                |                                       |                                                                                                               |
|              |       | On demand                |  |                                                                                                              |                   |                                                                                                                |                                       |                                                                                                               |
| Dried Chips  | [ 1 ] |                          |  |                                                                                                              |                   |                                                                                                                |                                       |                                                                                                               |
| Flour        | [ 2 ] |                          |  |                                                                                                              |                   |                                                                                                                |                                       |                                                                                                               |
| Grates,      | [ 3 ] |                          |  |                                                                                                              |                   |                                                                                                                |                                       |                                                                                                               |
| Gari         | [ 4 ] |                          |  |                                                                                                              |                   |                                                                                                                |                                       |                                                                                                               |
| Crisps       | [ 5 ] |                          |  |                                                                                                              |                   |                                                                                                                |                                       |                                                                                                               |
| Alcobeverage | [ 6 ] |                          |  |                                                                                                              |                   |                                                                                                                |                                       |                                                                                                               |
| Animal Feed  | [ 7 ] |                          |  |                                                                                                              |                   |                                                                                                                |                                       |                                                                                                               |
| Other        | [ 8 ] |                          |  |                                                                                                              |                   |                                                                                                                |                                       |                                                                                                               |
| Specifv      |       |                          |  |                                                                                                              |                   |                                                                                                                |                                       |                                                                                                               |

#### Part D: Storage

1. Do you store cassava products?

1. Yes 2. No

b. If yes, where do you store, how do you store and for how long?

| Product Stored |       | Where is the product stored?<br>On floor in house (1)<br>On a raised platform in house (2)<br>In a Granary (3)<br>Others (4) (specify) | Storage Container<br>propylene bags (1)<br>Baskets (2)<br>Canvas bags (3)<br>Jute Bags (4)<br>Drums (5)<br>Others (6)<br>Specify..... | Length (in days, weeks, months) of storage?<br>1-7 days (1)<br>>1-<2 weeks<br>Other (3) specify | Reason for storage<br>Food security (1)<br>Income (2)<br>Other (3) specify |
|----------------|-------|----------------------------------------------------------------------------------------------------------------------------------------|---------------------------------------------------------------------------------------------------------------------------------------|-------------------------------------------------------------------------------------------------|----------------------------------------------------------------------------|
| Chips          | [ 1 ] |                                                                                                                                        |                                                                                                                                       |                                                                                                 |                                                                            |
| Flour          | [ 2 ] |                                                                                                                                        |                                                                                                                                       |                                                                                                 |                                                                            |
| Grates,        | [ 3 ] |                                                                                                                                        |                                                                                                                                       |                                                                                                 |                                                                            |
| Gari           | [ 4 ] |                                                                                                                                        |                                                                                                                                       |                                                                                                 |                                                                            |
| Crisps         | [ 5 ] |                                                                                                                                        |                                                                                                                                       |                                                                                                 |                                                                            |
| Alcobeverage   | [ 6 ] |                                                                                                                                        |                                                                                                                                       |                                                                                                 |                                                                            |
| Animal Feed    | [ 7 ] |                                                                                                                                        |                                                                                                                                       |                                                                                                 |                                                                            |
| Other          | [ 8 ] |                                                                                                                                        |                                                                                                                                       |                                                                                                 |                                                                            |
| Specify        |       |                                                                                                                                        |                                                                                                                                       |                                                                                                 |                                                                            |

c) If no, why don't you store cassava products? \_\_\_\_\_

2. Do you store cassava in the same store with other crops?

Yes (1) No (2)

b) If yes, name the crops cassava is stored with?

|             |     |
|-------------|-----|
| Beans       | (1) |
| Cowpeas     | (2) |
| Pigeon pea  | (3) |
| Green grams | (4) |
| Maize       | (5) |



|               |     |
|---------------|-----|
| Other         | (6) |
| Specify ..... |     |

3. .what are the cause(s) of loss of during storage and what do you do with the damaged/spoilt cassava products?

| <b>Product</b> | <b>Main causes of loss</b>                                                              | <b>What you do you with the damaged/ spoilt cassava products</b> |
|----------------|-----------------------------------------------------------------------------------------|------------------------------------------------------------------|
|                | Pests (1)<br>Caked (2)<br>Thieves (3)<br>broken (4)<br>rots (5)<br>Others (6) (specify) | Cook (1)<br>Sell (2)<br>Throw (3)<br>Other (4)<br>Specify        |
| Chips          |                                                                                         |                                                                  |
| Flour          |                                                                                         |                                                                  |
| Grates,        |                                                                                         |                                                                  |
| Gari           |                                                                                         |                                                                  |
| Crisps         |                                                                                         |                                                                  |
| Alcobeverage   |                                                                                         |                                                                  |
| Animal Feed    |                                                                                         |                                                                  |
| Other          |                                                                                         |                                                                  |
| Specify        |                                                                                         |                                                                  |

### PART C: CONSUMPTION AND LIFE STYLE PATTERNS

- 1 a) What part of cassava do you consume, and in what form?

| <b>Part</b> |       | <b>Form</b>                                                                                          | <b>Frequency of consumption.</b>                    |
|-------------|-------|------------------------------------------------------------------------------------------------------|-----------------------------------------------------|
|             |       | Raw [ 1 ]<br>Cooked [ 2 ]<br>Boiled [ 3 ]<br>Fried [ 4 ]<br>Roasted [ 5 ]<br>Others [ 6 ]<br>Specify | Daily (1)<br>weekly (2)<br>monthly (3)<br>other (4) |
| Root        | [ 1 ] |                                                                                                      |                                                     |
| Leaves      | [ 2 ] |                                                                                                      |                                                     |

|       |     |  |  |
|-------|-----|--|--|
| Other | (3) |  |  |
|-------|-----|--|--|

1b) Do you incorporate any other type of food during preparation? If yes, how and how frequently?

| Part   |       | Yes [ 1 ]<br><br>No [ 2 ] | Incorporated<br>With other food<br>Cowpeas seeds [ 1 ]<br>Cowpeas leaves [ 2 ]<br>Pigeon peas seeds [ 3 ]<br>Others [ 4 ]<br>Specify | How do<br>incorporate?<br>Boiled [ 1 ]<br>Fried [ 2 ]<br>Both [ 3 ]<br>Others [ 4 ]<br>Specify | Frequency of<br>consumption.<br>Daily (1) weekly (2)<br>monthly (3) other (4) |
|--------|-------|---------------------------|--------------------------------------------------------------------------------------------------------------------------------------|------------------------------------------------------------------------------------------------|-------------------------------------------------------------------------------|
| Root   | [ 1 ] |                           |                                                                                                                                      |                                                                                                |                                                                               |
| Leaves | [ 2 ] |                           |                                                                                                                                      |                                                                                                |                                                                               |

1. Which varieties do you frequently consume and is the variety bitter or sweet?

| variety     | Frequently<br>consumed | Bitter (1) sweet<br>(2) |
|-------------|------------------------|-------------------------|
| Tajirika    | (1)                    |                         |
| Shibe       | (2)                    |                         |
| Kibandameno | (3)                    |                         |
| Nzalauka    | (4)                    |                         |
| Karibuni    | (5)                    |                         |
| Karembo     | (6)                    |                         |
| Girikacha   | (7)                    |                         |
| Either      | ( 8 )                  |                         |

1. a) Which cassava processed products do you frequently consume? And what is the source of the processed product?

| <b>Product</b> |       | <b>Source</b><br>Supermarket/retail (1)<br>Wholesale (2)<br>Cooperative (3)<br>Others (4)<br>specify | <b>buying Frequency :</b><br>Daily (1) weekly<br>(2) monthly (3)<br>other (4)<br>specify | <b>Consumption Frequency :</b><br>Daily (1)<br>weekly (2)<br>monthly (3)<br>other (4)<br>Specify ..... | <b>Preference Reason</b><br><br>Cheap (1)<br>Reliable (2)<br>Safe (3)<br>Other (4)<br>Specify..... |
|----------------|-------|------------------------------------------------------------------------------------------------------|------------------------------------------------------------------------------------------|--------------------------------------------------------------------------------------------------------|----------------------------------------------------------------------------------------------------|
| Chips          | [ 1 ] |                                                                                                      |                                                                                          |                                                                                                        |                                                                                                    |
| Flour          | [ 2 ] |                                                                                                      |                                                                                          |                                                                                                        |                                                                                                    |
| Grates,        | [ 3 ] |                                                                                                      |                                                                                          |                                                                                                        |                                                                                                    |
| Gari           | [ 4 ] |                                                                                                      |                                                                                          |                                                                                                        |                                                                                                    |
| Crisps         | [ 5 ] |                                                                                                      |                                                                                          |                                                                                                        |                                                                                                    |
| Alcobeverage   | [ 6 ] |                                                                                                      |                                                                                          |                                                                                                        |                                                                                                    |
| Animal Feed    | [ 7 ] |                                                                                                      |                                                                                          |                                                                                                        |                                                                                                    |
| Other          | [ 8 ] |                                                                                                      |                                                                                          |                                                                                                        |                                                                                                    |
| Specify        |       |                                                                                                      |                                                                                          |                                                                                                        |                                                                                                    |

1c. if flour is mentioned, what else do you incorporate with the flour and which are the common meals you prepare from flour or flour incorporate?

| <b>Products</b>             |       | <b>Meal, (may tick more than one).</b><br>Ugali [ 1 ]<br>Porridge [ 2 ]<br>Chapati [ 3 ]<br>Bread [ 4 ]<br>Cake [ 5 ] |
|-----------------------------|-------|-----------------------------------------------------------------------------------------------------------------------|
| Cassava flour alone         | [ 1 ] |                                                                                                                       |
| Cassava flour + maize flour | [ 2 ] |                                                                                                                       |
| Cassava flour + Wheat flour | [ 3 ] |                                                                                                                       |
| Other specify.....          | [ 4 ] |                                                                                                                       |

2. When does your household consume cassava/ cassava based products most? Specify.

| JAN | FEB | MAR | APR | MAY | JUN | JUL | AUG | SEPT | OCT | NOV | DEC |
|-----|-----|-----|-----|-----|-----|-----|-----|------|-----|-----|-----|
| 1   | 2   | 3   | 4   | 5   | 6   | 7   | 8   | 9    | 10  | 11  | 12  |

3. a) In your households are there family members exempted from cassava based meals?

1-Yes [ ] 2-No [ ]

c) If yes, kindly list them

|                 |       |
|-----------------|-------|
| elderly         | [ 1 ] |
| expectant women | [ 2 ] |
| Children        | [ 3 ] |
| Other           | [ 4 ] |
| specify         |       |

c) Have you or anyone you know experienced negative reactions after consuming cassava roots/products?

1-Yes [ ] 2- NO [ ]

d) If YES, kindly list the reactions exhibited by these members and how they were managed?

| Reaction      |       | Management<br>Sought medical attention<br>The symptoms dissipated |
|---------------|-------|-------------------------------------------------------------------|
| Constipation  | [ 1 ] |                                                                   |
| Skin rashes   | [ 2 ] |                                                                   |
| Diarrhea      | [ 3 ] |                                                                   |
| Vomiting      | [ 4 ] |                                                                   |
| Dizziness     | [ 5 ] |                                                                   |
| Faint         | [ 6 ] |                                                                   |
| Death         | [ 7 ] |                                                                   |
| Other specify | [ 8 ] |                                                                   |

e. What is the probable cause of the negative reaction?

.....

**4. d) Part E : Marketing of cassava and cassava products**

1. What cassava products do you sell?

| <b>Product</b><br>(you can tick more than 1) |       | <b>To who?</b><br>Consumer<br>Retailer<br>Bulkier<br>Wholesale<br>Others, specify | <b>Selling Frequency :</b><br>Daily (1) weekly<br>(2) monthly (3)<br>other (4) | Packaging | Sale Units<br>Kg | Sale Price |
|----------------------------------------------|-------|-----------------------------------------------------------------------------------|--------------------------------------------------------------------------------|-----------|------------------|------------|
| Fresh roots                                  | [ 1 ] |                                                                                   |                                                                                |           |                  |            |
| Leaves                                       | [ 2 ] |                                                                                   |                                                                                |           |                  |            |
| Cuttings                                     | [ 3 ] |                                                                                   |                                                                                |           |                  |            |
| Dry chips                                    | [ 4 ] |                                                                                   |                                                                                |           |                  |            |
| Flour                                        | [ 5 ] |                                                                                   |                                                                                |           |                  |            |
| Animal Feed                                  | [ 6 ] |                                                                                   |                                                                                |           |                  |            |
| Other                                        | [ 7 ] |                                                                                   |                                                                                |           |                  |            |
| Specify                                      |       |                                                                                   |                                                                                |           |                  |            |

## WASTE MANAGEMENT

**How do you manage cassava peels?**

- Washing [ 1 ]
- Drying [ 2 ]
- Pressing [ 3 ]
- Milling [ 4 ]
- Other [ 5 ]
- specify

**THANK YOU FOR PARTICIPATING**
