# Supplementary figures and images for: Farmers' Sources and Varieties of Cassava Planting Materials in Coastal Kenya
Source: Frontiers journal article supplement (doi:10.3389/fsufs.2021.611089), 2021-12-06

## Appendix 1: Map of Kilifi and Taita Taveta counties

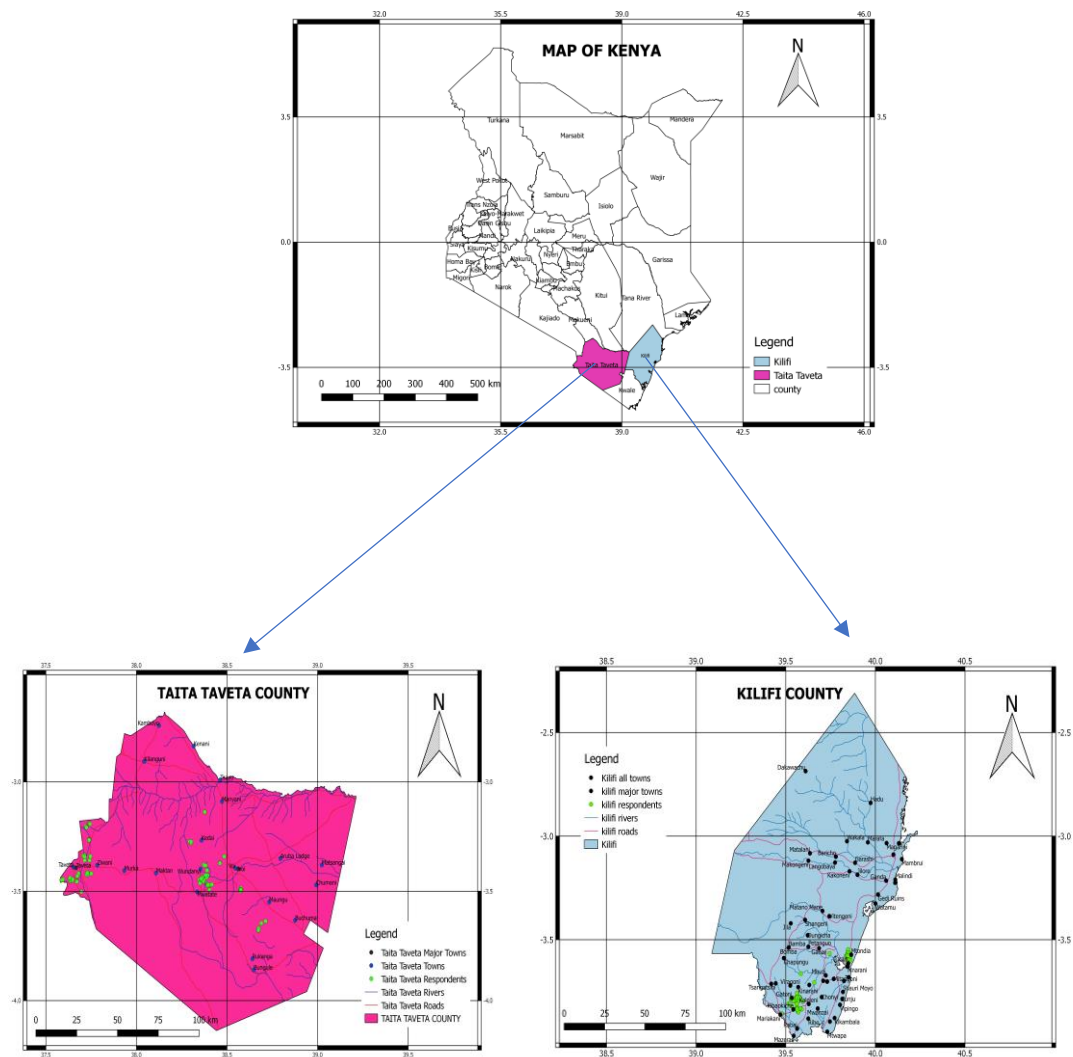

Supplement: Data_Sheet_1.pdf [file Data_Sheet_1.pdf]
